# Supplementary material
Source: publisher site journal article supplement (https://www.dovepress.com/article/321119)

**Schematic diagram of the self-made rat fixation device used in the EA experiment**
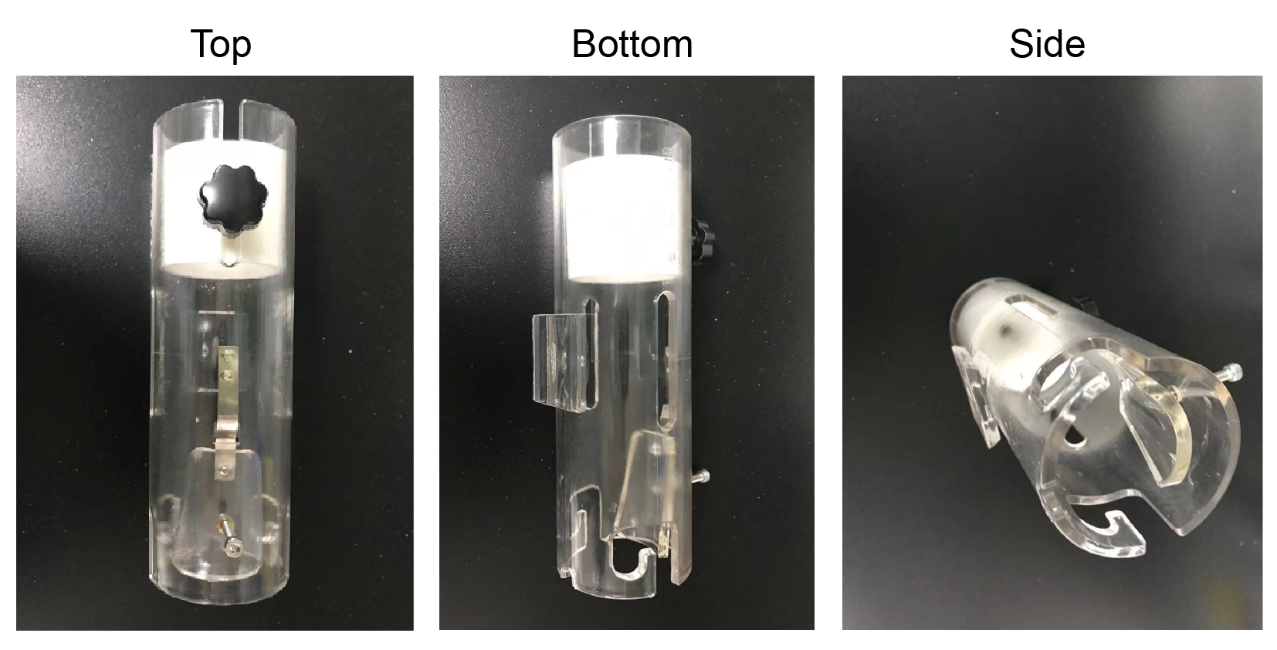

Supplement: Supplementary file 1 [file get_supplementary_file.php]
